# Supplementary material for: Investigation into the synthesis conditions of CuMoO4 by an in situ method and its photocatalytic properties under visible light irradiation
Source: Royal Society of Chemistry journal article supplement (doi:10.1039/d0ra00496k), 2020-01-01
Supplement: d0ra00496k1.pdf [file d0ra00496k1.pdf]

## Supporting information

Investigation on the synthesis conditions of  $\text{CuMoO}_4$  by in-situ method and their photocatalytic properties under visible light irradiation

Wencheng Tan, Jingfei Luan\*

*State Key Laboratory of Pollution Control and Resource Reuse, School of the Environment, Nanjing University, Nanjing 210093, China. E-mail: chendibd71@126.com*

\* *Correspondence: jfluan@nju.edu.cn; Tel.: +86-199-5193-9498; Fax: +86-25-8968-0397*

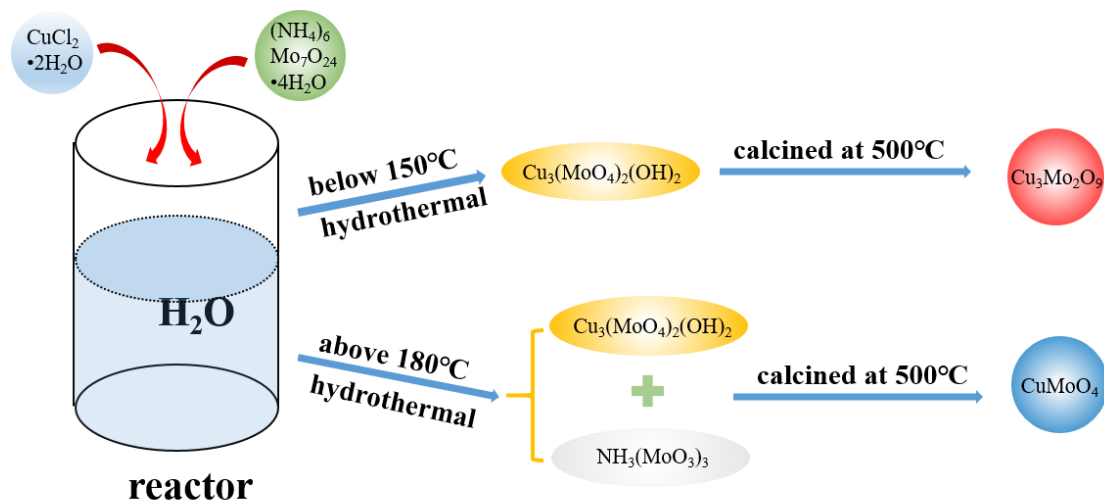

Fig.S1. Synthesis route of  $\text{CuMoO}_4$

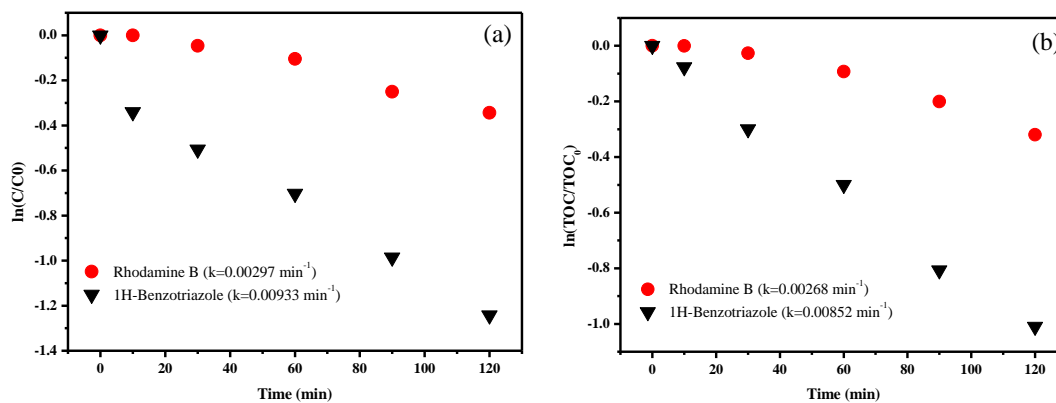

Fig.S2. Observed first order kinetic plots for the photocatalytic degradation of rhodamine B or 1H-Benzotriazole with  $\text{CuMoO}_4$  as catalyst under visible light irradiation

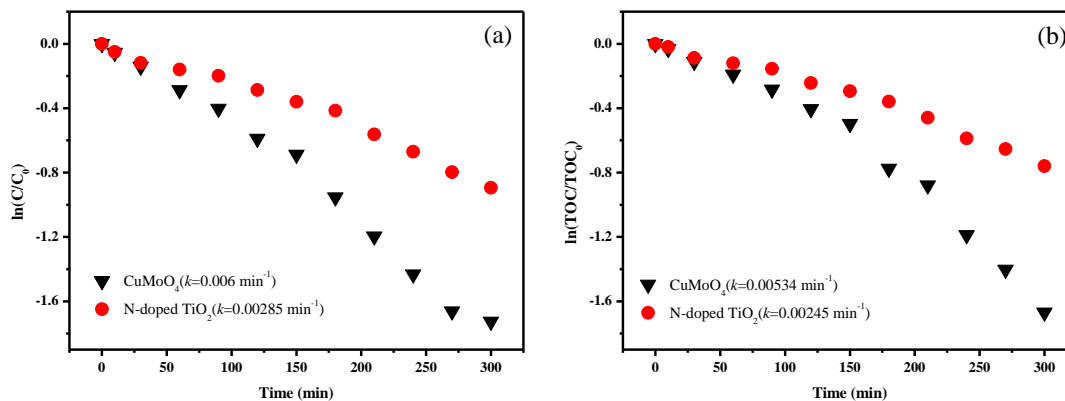

**Fig.S3.** Observed first order kinetic plots for the photocatalytic degradation of rhodamine B with CuMoO<sub>4</sub> or N-doped TiO<sub>2</sub> as photocatalyst under visible light irradiation

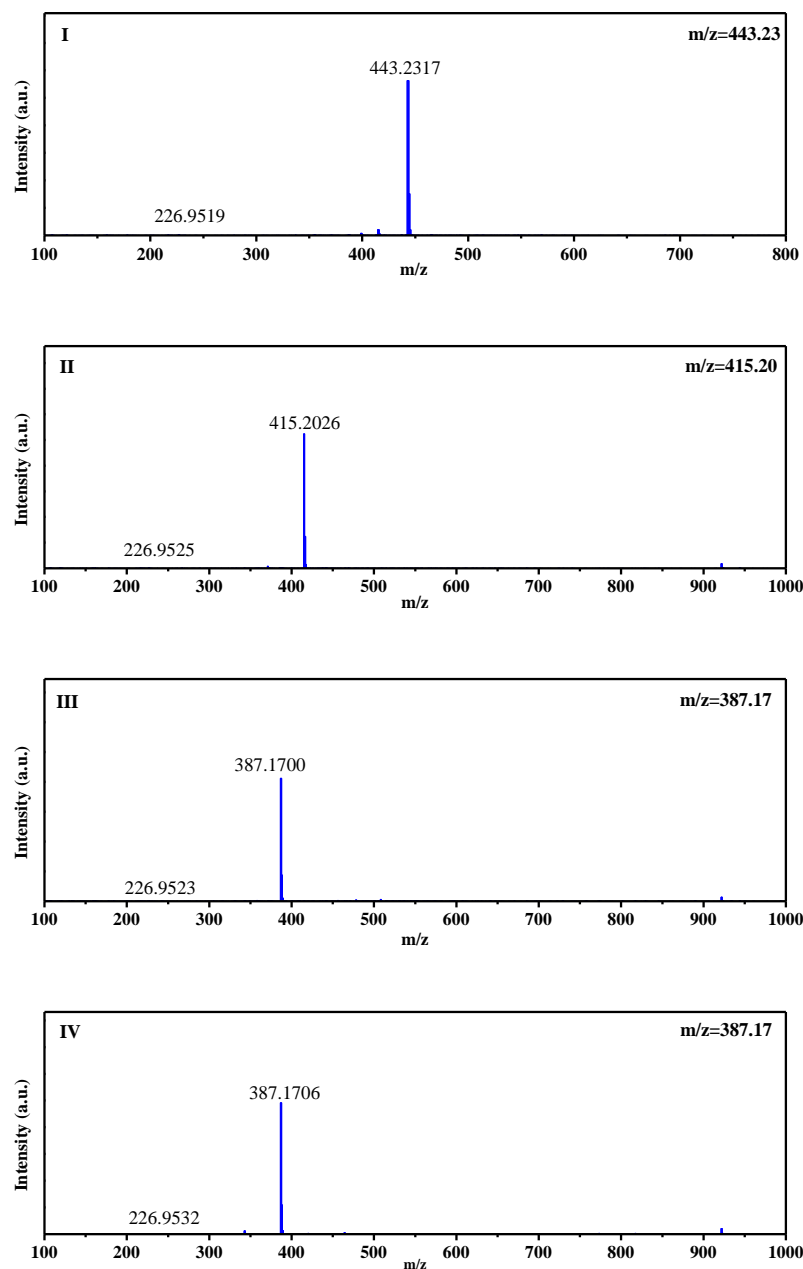

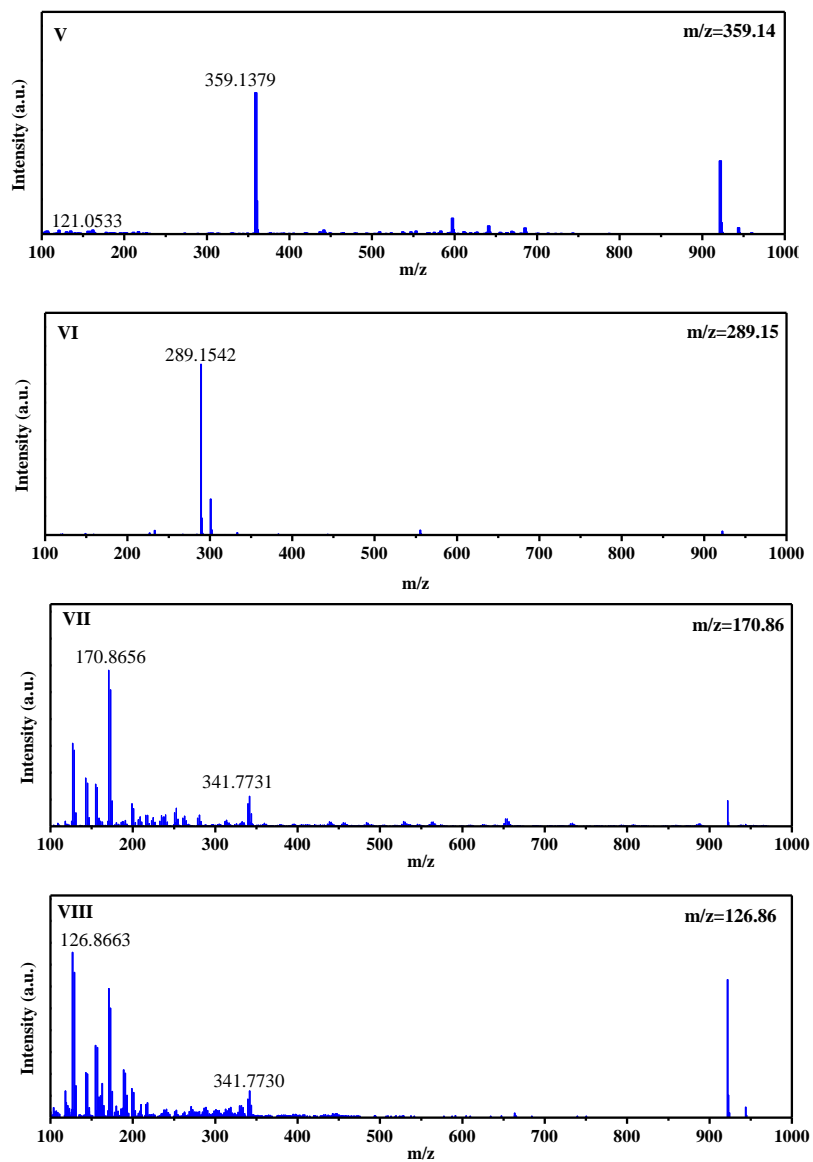

**Fig.S4.** The mass spectra of degraded rhodamine B by using  $\text{CuMoO}_4$  photocatalyst.

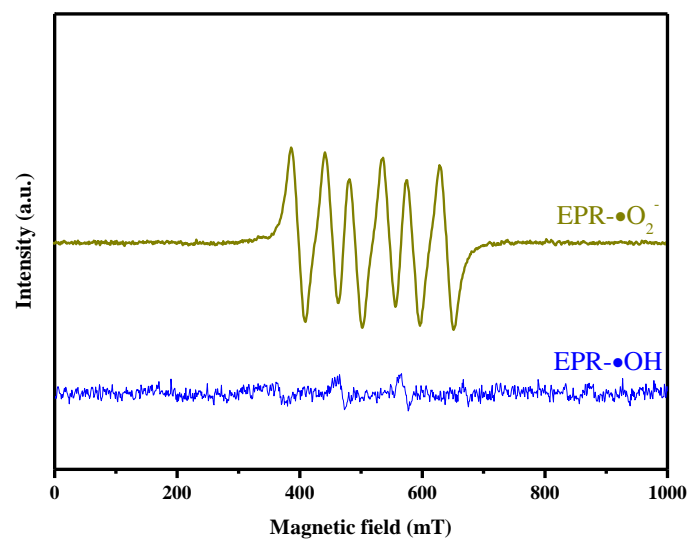

**Fig.S5.** EPR spectra of CuMoO<sub>4</sub> in aqueous dispersion for •OH and in methanol dispersion for •O<sub>2</sub><sup>-</sup>
